# Supplementary material for: Formation of phosphonate coatings for improved chemical stability of upconverting nanoparticles under physiological conditions
Source: Royal Society of Chemistry journal article supplement (doi:10.1039/d1dt00304f), 2021-01-01
Supplement: d1dt00304f1.pdf [file d1dt00304f1.pdf]

## Supporting Information

### Formation of phosphonate coatings for the improved chemical stability of upconverting nanoparticles under physiological conditions

Maša Vozlič,<sup>a,b</sup> Tina Černič,<sup>a,c</sup> Sašo Gyergyek,<sup>a</sup> Boris Majaron,<sup>d,e</sup> Maja Ponikvar-Svet,<sup>f</sup> Uliana Kostiv,<sup>g</sup> Daniel Horák,<sup>g</sup> and Darja Lisjak<sup>\*c</sup>

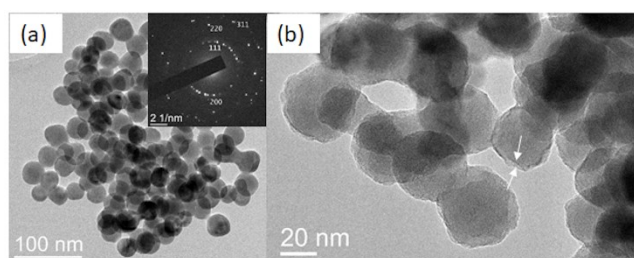

**Fig. S1** TEM images of the as-synthesized  $\alpha$ -NPs with the corresponding SAED (a), and of the  $\alpha$ -NPs coated with the nominal ligand fraction of 10 EDTMP/nm<sup>2</sup> using US agitation for 2 h (b). The indices in the SAED (a) correspond to cubic S.G. Fm $\bar{3}$ m (225). The arrows in (b) indicate the amorphous coating.

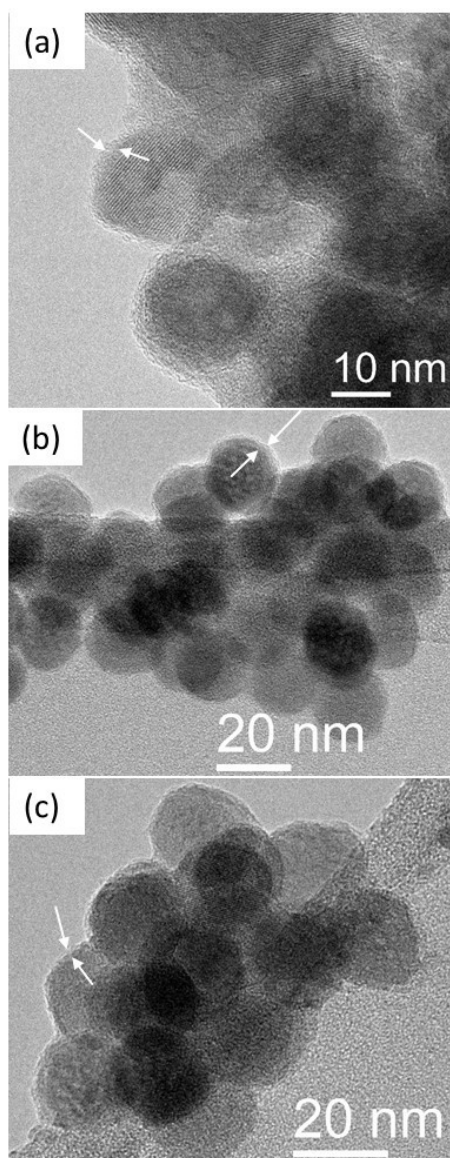

**Fig. S2** TEM images of coated  $\beta$ -UCNPs with EDTMP (a), AL (b) and PEG-Ner (c). All  $\beta$ -UCNPs were coated with nominal ligand fraction 10 molecules/nm<sup>2</sup>. The EDTMP coating (a) was prepared in US bath and the other two coatings (b and c) were obtained at 80 °C. Arrows point to the amorphous coating.

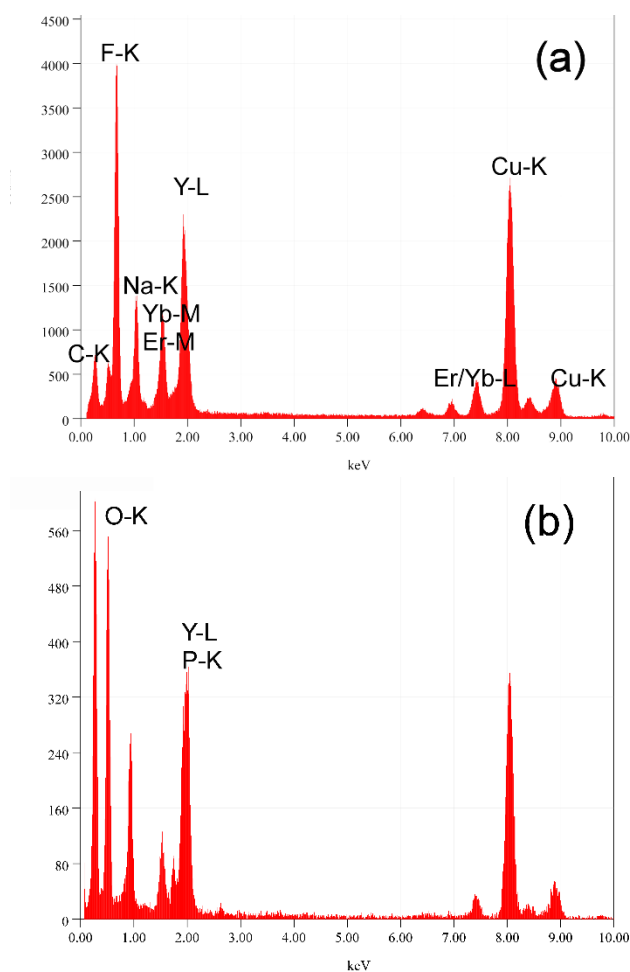

**Fig. S3** EDXS spectra of the bare  $\beta$ -UCNPs (a) and  $\beta$ -UCNPs@EDTMP (b). Cu-K and C-K peaks originate from the TEM supporting grid but in the panel (b) C-K peak also originates from the coating.

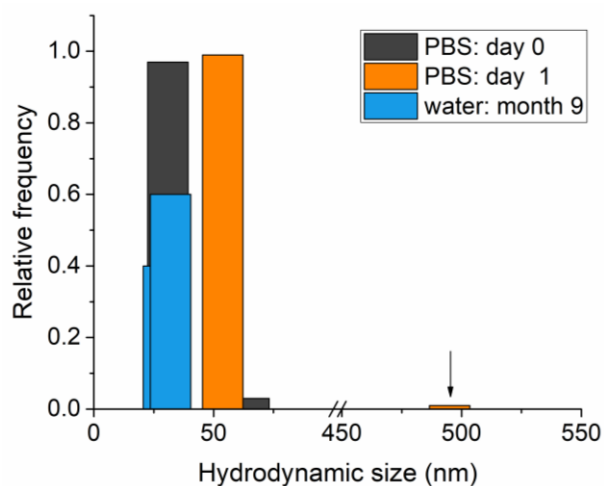

**Fig. S4** Number-weighted hydrodynamic-size distribution of the UCNPs@PEG-Ner (made at 80 °C) in PBS and water. An arrow points at the large size fraction, measured 1 day after the immersion of UCNPs@PEG-ner in PBS.
